# Supplementary material
Source: PubMed Central journal article supplement (PMC9760124)
Supplement: mmc1.pdf [file mmc1.pdf]

# THE LANCET

## Infectious Diseases

### Supplementary appendix

This appendix formed part of the original submission. We post it as supplied by the authors.

Supplement to: Yu D, LiangY, Zheng Y, YangY. Clindamycin-resistant *Streptococcus pyogenes* in Chinese children. *Lancet Infect Dis* 2021; **21**: 1631–32.

**Table 1 The resistance rate of GAS to clindamycin and erythromycin in China in the past 30 years**

| Year      | City/Province                                                                    | No. of<br>GAS strains | Clindamycin<br>resistance rate (%) | Erythromycin<br>resistance rate (%) | First Author   | Journal,year,volume,page                             |
|-----------|----------------------------------------------------------------------------------|-----------------------|------------------------------------|-------------------------------------|----------------|------------------------------------------------------|
| 1993~1994 | Beijing                                                                          | 137                   | 75.4                               | 79.7                                | Lijuan Feng    | Diagn Microbiol Infect Dis 2010;<br>67:369-75        |
| 2004~2011 | Wenzhou                                                                          | 19                    | 70.0                               | 55.0                                | Jiemin Fan     | Chi J Pediatr 2014;52:46-50 (Chinese)                |
| 2005      | Guizhou                                                                          | 68                    | 4.4                                | 88.2                                | Minghuan Zheng | J Clin Microbiol 2009;47:715-20                      |
| 2005~2006 | Beijing, Shanghai, Chongqing,<br>Guangzhou, Shenzhen                             | 222                   | 96.4                               | 93.69                               | Yaoling Ma     | Chin J Infect Chemother, 2008;8:338-42<br>(Chinese)  |
| 2005~2008 | Beijing, Shanghai, Chongqing,<br>Guangzhou, Shenzhen                             | 371                   | 96.9                               | 94.0                                | Lijuan Feng    | Chin J Infect Chemother,<br>2010;10:127-30 (Chinese) |
| 2005~2008 | Beijing, Shanghai, Chongqing,<br>Shenzhen                                        | 466                   | 97.2                               | 97.6                                | Yunmei Liang   | J Med Microbiol 2012;61:975-83                       |
| 2007      | Beijing, Shanghai,Shenzhen,<br>hongqing                                          | C <sub>188</sub>      | 97.8                               | 96.8                                | Xiaorong Liu   | Pediatric Pulmonology 2009;44:436-41                 |
| 2007      | Beijing, Shanghai                                                                | 145                   | 97.9                               | 97.9                                | Yunmei Liang   | Acta Paediatr 2008;97:1681-85                        |
| 2007~2008 | Beijing, Chongqing                                                               | 94                    | 96.8                               | 96.8                                | Hesheng Chang  | Scand J Infect Dis 2010;42:84-89                     |
| 2008      | 89 tertiary first-class hospitals<br>in China mainland (2008<br>Mohnarin Report) | 184                   | 69.2                               | 70.5                                | Jin Wang       | Chin J Nosocomiol 2010;20:2393-98<br>(Chinese)       |

|           |                                                                                    |      |      |              |                             |
|-----------|------------------------------------------------------------------------------------|------|------|--------------|-----------------------------|
| 2009~2016 | Beijing,Huhehot, Zhengzhou,<br>Wuhan,Nangning, Miangyang, 140<br>Tai'an            | 94.2 | 93.5 | Binghuai Lu  | Front Microbiol 2017;8:1052 |
| 2010~2017 | Hangzhou,Shanghai,Chongqing<br>,Ningbo,Taiyuan,Jinan,Linhai, 66<br>Wenzhou,Kaifeng | 88.9 | 81.4 | Chunzhen Hua | BMC Pediatr 2019;19:181.    |
| 2016~2018 | Shenzhen 342                                                                       | 90.6 | 91.2 | Dingle Yu    | Front Microbiol (accepted)  |

---
